# Supplementary material for: Solution- and gas-phase behavior of decavanadate: implications for mass spectrometric analysis of redox-active polyoxidometalates
Source: Royal Society of Chemistry journal article supplement (doi:10.1039/d1qi01618k), 2022-01-01
Supplement: d1qi01618k1.pdf [file d1qi01618k1.pdf]

Supplementary Material for

**Solution- and gas-phase behavior of decavanadate: implications for mass spectrometric analysis of redox-active polyoxometalates**

Daniel Favre,<sup>1</sup> Cedric E. Bobst,<sup>1</sup> Stephen J. Eyles,<sup>2</sup> Debbie C. Crans<sup>3</sup> and Igor A. Kaltashov<sup>1,\*</sup>

*Departments of Chemistry<sup>1</sup> and Biochemistry and Molecular Biology,<sup>2</sup> University of Massachusetts-Amherst, Amherst, MA and Departments of Chemistry, Colorado State University, Ft. Collins, CO<sup>3</sup>*

## Table of contents

**Figure S1.** Positive ion ESI mass spectrum of a 1 mM aqueous solution of  $(\text{NH}_4)_6\text{V}_{10}\text{O}_{28}$ . The zoomed view (inset) shows variation in the extent of partial reduction of V10 species.

**Figure S2.** (a-e) Zoomed view of **Figure 1** containing 200-400 m/z (a), 400-600 m/z (b), 600-800 m/z (c), 800-1000 m/z (d), and 1000-1200 m/z (e).

**Figure S3.** Negative ion ESI mass spectra of a 0.1 mM aqueous solutions of  $\text{K}_4\text{Na}_2\text{V}_{10}\text{O}_{28}$  and  $\text{Na}_6\text{V}_{10}\text{O}_{28}$ . The zoomed views (inset) shows variation in the extent of partial reduction of V10 species.

**Figure S4.** Mass spectra of fragment ions produced by collisional activation of  $\text{H}_4\text{V}_{10}\text{O}_{28}^{2-}$  (a 10-m/z unit mass selection window centered on the most abundant isotopolog).

**Table S1.** Table of m/z values, abundance values, and molecular formulas of assigned peaks labeled in Figure 1.

**Table S2.** Table of m/z values, abundance values, and molecular formulas of assigned peaks labeled in Figure 3.

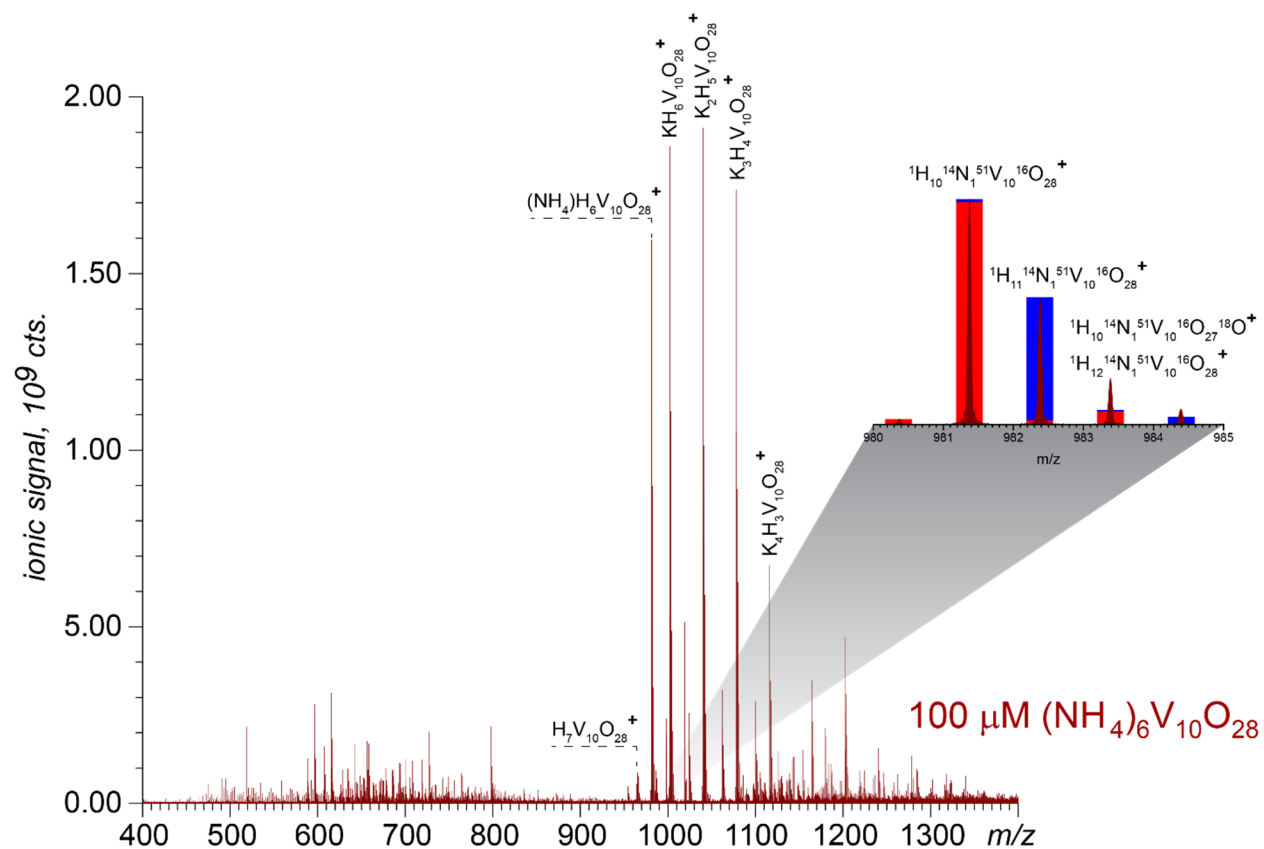

**Figure S1.** Positive ion ESI mass spectrum of a 1 mM aqueous solution of  $(\text{NH}_4)_6\text{V}_{10}\text{O}_{28}$ . The zoomed view (inset) shows variation in the extent of partial reduction of V10 species.

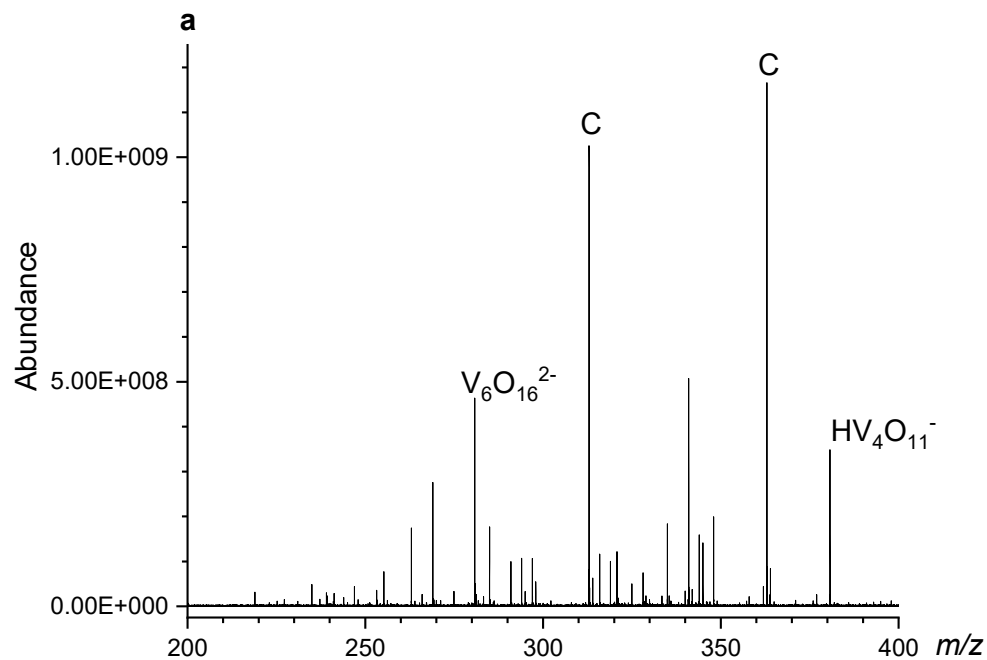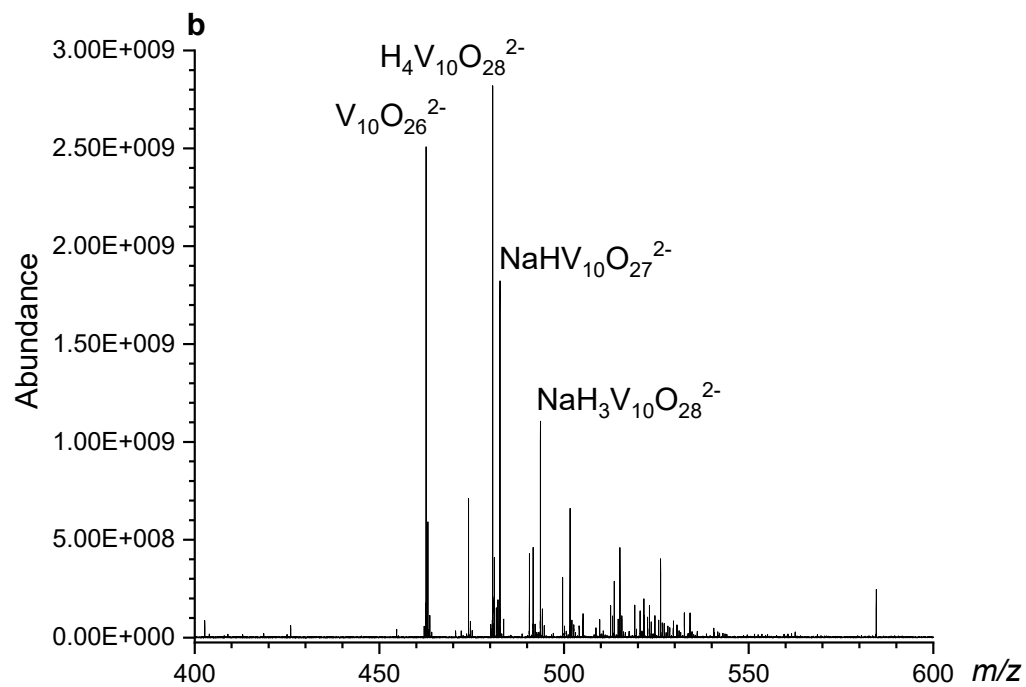

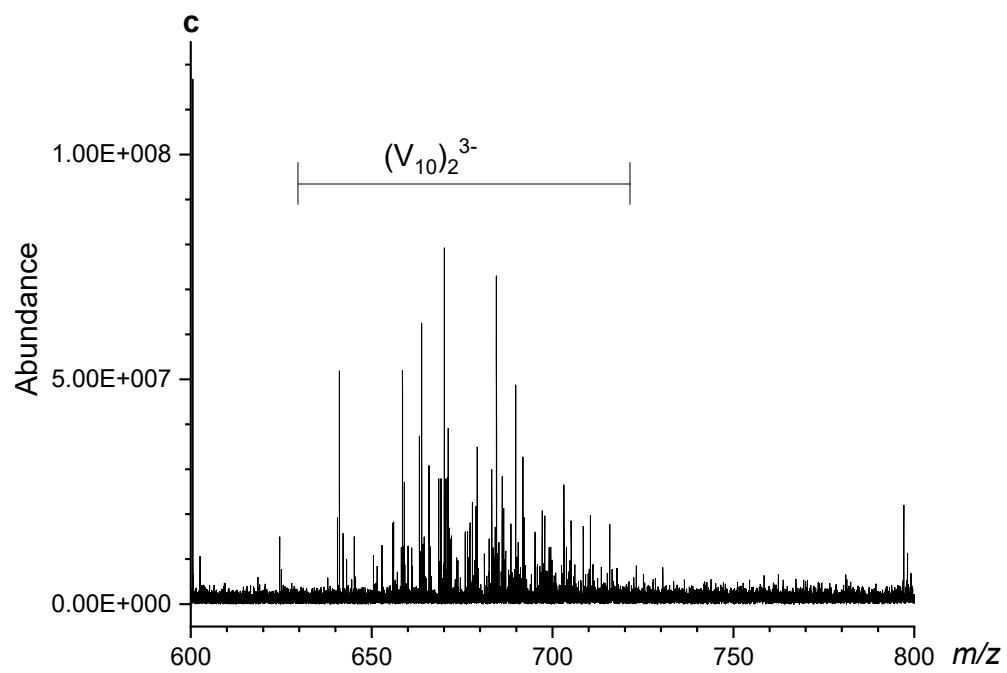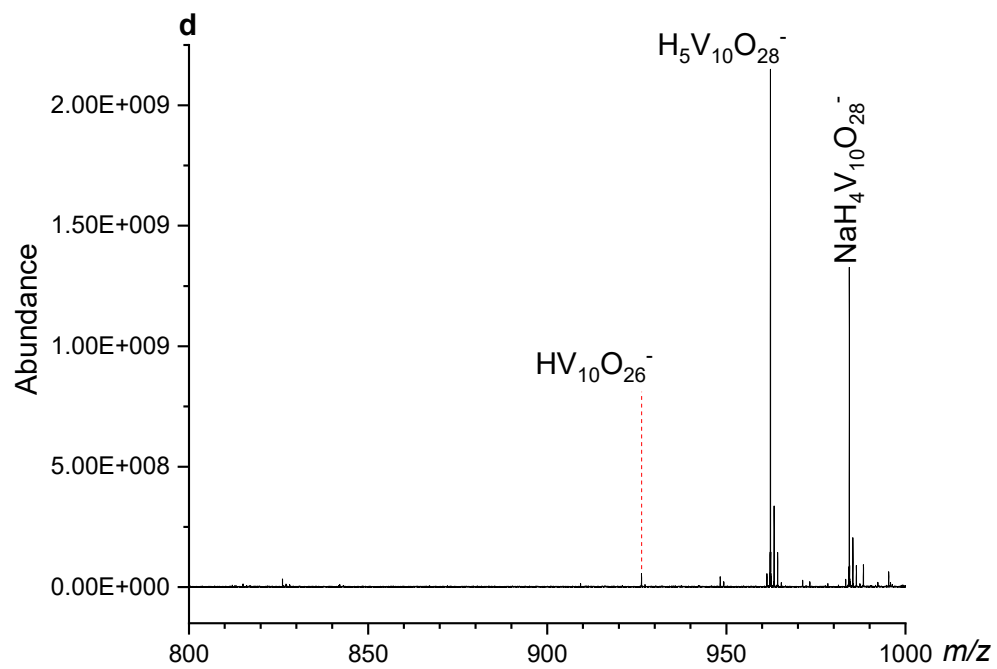

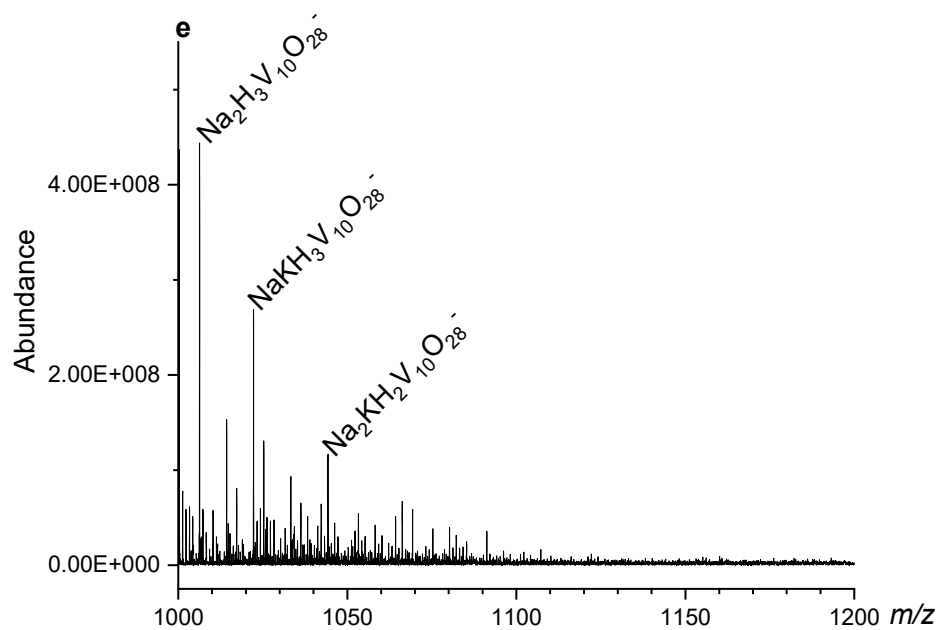

**Figure S2.** (a-e) Zoomed view of **Figure 1** containing 200-400  $m/z$  (a), 400-600  $m/z$  (b), 600-800  $m/z$  (c), 800-1000  $m/z$  (d), and 1000-1200  $m/z$  (e).

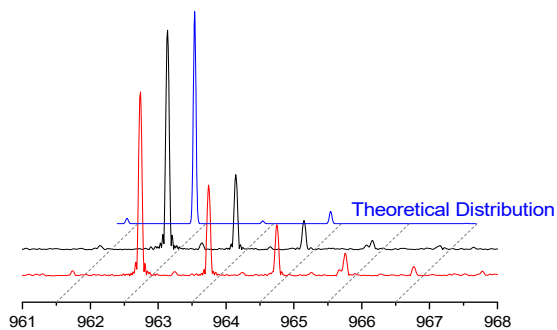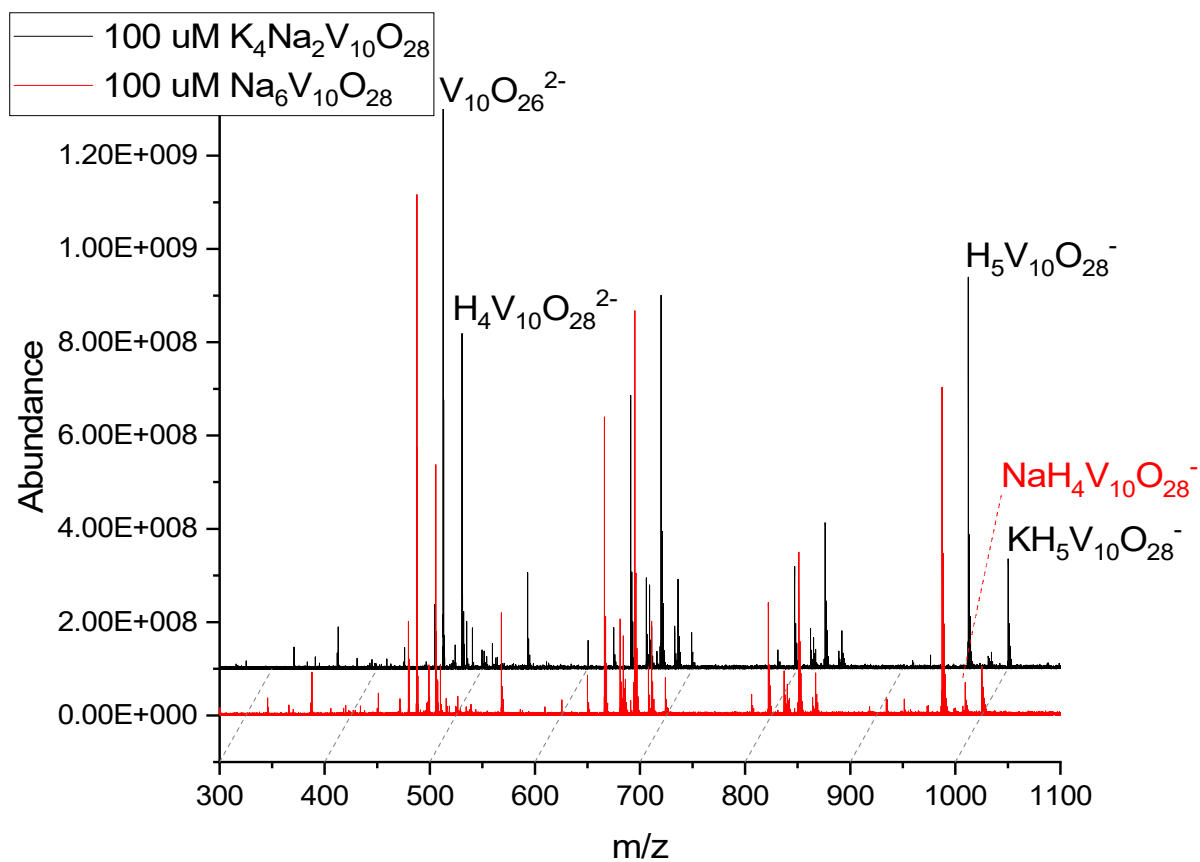

**Figure S3.** Negative ion ESI mass spectra of a 0.1 mM aqueous solutions of  $\text{K}_4\text{Na}_2\text{V}_{10}\text{O}_{28}$  and  $\text{Na}_6\text{V}_{10}\text{O}_{28}$ . The zoomed views (inset) shows variation in the extent of partial reduction of V10 species.

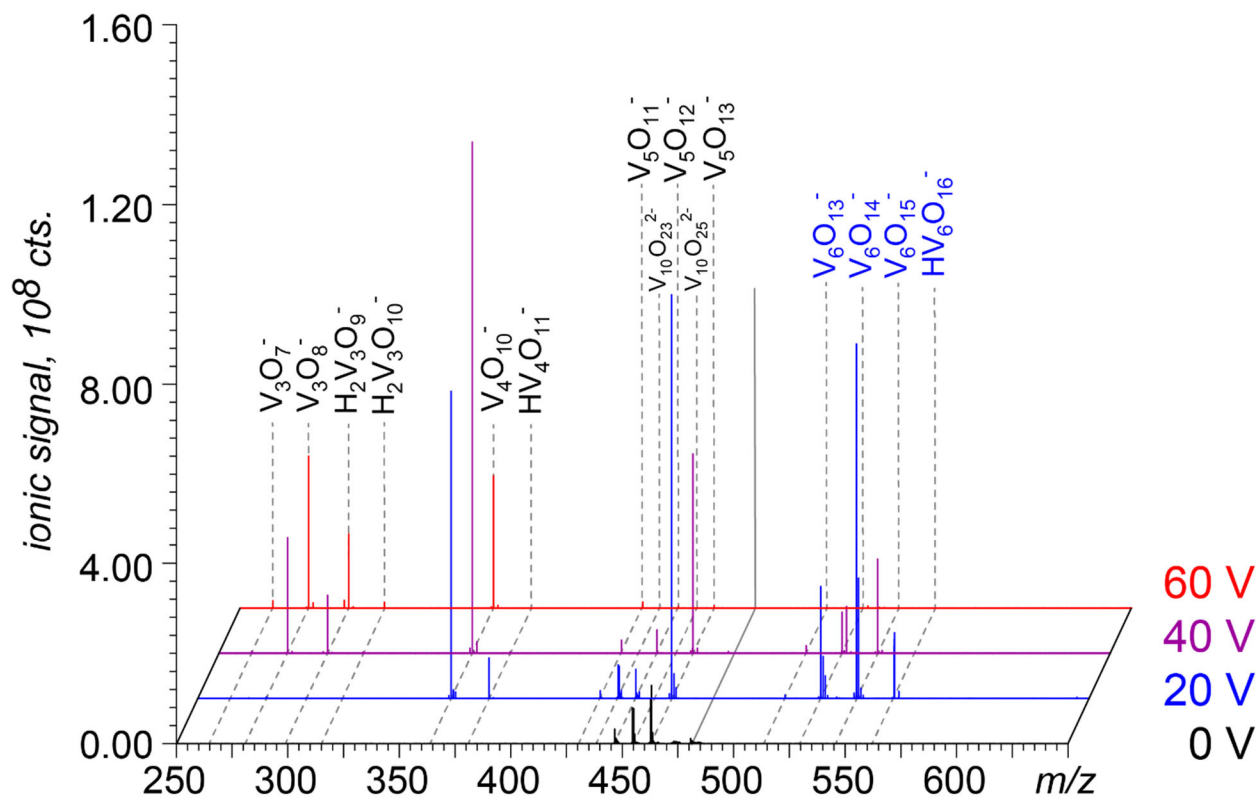

**Figure S4.** Mass spectra of fragment ions produced by collisional activation of  $\text{H}_4\text{V}_{10}\text{O}_{28}^{2-}$  (a 10- $m/z$  unit mass selection window centered on the most abundant isotopolog).



**Table S1.** Table of m/z values, abundance values, and molecular formulas of assigned peaks labeled in Figure 1.

| m/z        | Abundance  | Assignment                                                                            |
|------------|------------|---------------------------------------------------------------------------------------|
| 280.79181  | 463657760  | $V_6O_{16}^{2-}$                                                                      |
| 380.72834  | 348287360  | $HV_4O_{11}^-$                                                                        |
| 402.71042  | 86153448   | $NaV_4O_{11}^-$                                                                       |
| 454.65697  | 41454484   | $V_{10}O_{25}^{2-}$                                                                   |
| 462.65415  | 2507207936 | $V_{10}O_{26}^{2-}$                                                                   |
| 480.66477  | 2819456768 | $H_4V_{10}O_{28}^{2-}$                                                                |
| 491.65596  | 460635648  | $NaH_3V_{10}O_{28}^{2-}$                                                              |
| 909.31335  | 15266076   | $V_{10}O_{25}^-$                                                                      |
| 926.31722  | 55977468   | $HV_{10}O_{26}^-$                                                                     |
| 948.29856  | 43151184   | $NaV_{10}O_{26}^-$                                                                    |
| 961.3389   | 54973988   | $H_5^{50}V_1^{51}V_9^{16}O_{28}^-$                                                    |
| 962.33733  | 2149368832 | $H_5^{51}V_{10}^{16}O_{28}^-$                                                         |
| 963.34409  | 336441952  | $H_6^{51}V^{(V)}_9^{51}V^{(IV)}_1^{16}O_{28}^-$                                       |
| 964.3425   | 143054736  | $H_5^{51}V_{10}^{16}O_{27}^{18}O_1^- / H_7^{51}V^{(V)}_8^{51}V^{(IV)}_2^{16}O_{28}^-$ |
| 965.3452   | 18526682   | $H_6^{51}V^{(V)}_9^{51}V^{(IV)}_1^{16}O_{27}^{18}O_1^-$                               |
| 984.32005  | 1326984192 | $NaH_4V_{10}O_{28}^-$                                                                 |
| 1000.29332 | 436956064  | $KH_4V_{10}O_{28}^-$                                                                  |
| 1006.29836 | 443729952  | $Na_2H_3V_{10}O_{28}^-$                                                               |
| 1022.27253 | 269013696  | $NaKH_3V_{10}O_{28}^-$                                                                |

**Table S2.** Table of m/z values, abundance values, and molecular formulas of assigned peaks labeled in Figure 3.

|                                                                    |             |                                                               |
|--------------------------------------------------------------------|-------------|---------------------------------------------------------------|
| MSMS NaH <sub>4</sub> V <sub>10</sub> O <sub>28</sub> <sup>-</sup> |             |                                                               |
| m/z                                                                | Abundance   | Assignment                                                    |
| 932.29868                                                          | 24559972    | NaV <sub>10</sub> O <sub>25</sub> <sup>-</sup>                |
| 948.29585                                                          | 2927228672  | NaV <sub>10</sub> O <sub>26</sub> <sup>-</sup>                |
| 984.31444                                                          | 7289208     | NaH <sub>4</sub> V <sub>10</sub> O <sub>28</sub> <sup>-</sup> |
| MSMS H <sub>5</sub> V <sub>10</sub> O <sub>28</sub> <sup>-</sup>   |             |                                                               |
| m/z                                                                | I           | Assignment                                                    |
| 909.31073                                                          | 634640256   | V <sub>10</sub> O <sub>25</sub> <sup>-</sup>                  |
| 926.31386                                                          | 5410646528  | HV <sub>10</sub> O <sub>26</sub> <sup>-</sup>                 |
| 962.33469                                                          | 138024608   | H <sub>5</sub> V <sub>10</sub> O <sub>28</sub> <sup>-</sup>   |
| MSMS H <sub>4</sub> V <sub>10</sub> O <sub>28</sub> <sup>2-</sup>  |             |                                                               |
| m/z                                                                | I           | Assignment                                                    |
| 454.65651                                                          | 119309936   | V <sub>10</sub> O <sub>25</sub> <sup>2-</sup>                 |
| 462.65375                                                          | 10193562624 | V <sub>10</sub> O <sub>26</sub> <sup>2-</sup>                 |
| 480.66433                                                          | 126364768   | H <sub>4</sub> V <sub>10</sub> O <sub>28</sub> <sup>2-</sup>  |
